# Supplementary material
Source: PubMed Central journal article supplement (PMC8282728)
Supplement: NIHMS1697816-supplement-2.pdf [file NIHMS1697816-supplement-2.pdf]

**Table S1.** Substitution models for unphased CG methylation data applicable to clonal populations. Shown are also their matching DNA based substitution models.

| DNA substitution model | Are equilibrium frequencies same for all states? | Are relative transition rates always 1? | Q matrix (DNA)                                                                                                                                                                                                   | Q matrix (Unphased CpG methylation)                                                                     |
|------------------------|--------------------------------------------------|-----------------------------------------|------------------------------------------------------------------------------------------------------------------------------------------------------------------------------------------------------------------|---------------------------------------------------------------------------------------------------------|
| JC69 [1]               | Yes                                              | Yes                                     | $\begin{bmatrix} - & \lambda & \lambda & \lambda \\ \lambda & - & \lambda & \lambda \\ \lambda & \lambda & - & \lambda \\ \lambda & \lambda & \lambda & - \end{bmatrix}$                                         | $\begin{bmatrix} - & \lambda & \lambda \\ \lambda & - & \lambda \\ \lambda & \lambda & - \end{bmatrix}$ |
| K80 [2]                | Yes                                              | No                                      | $\begin{bmatrix} - & \alpha & \beta & \beta \\ \alpha & - & \beta & \beta \\ \beta & \beta & - & \alpha \\ \beta & \beta & \alpha & - \end{bmatrix}$                                                             | $\begin{bmatrix} - & c & d \\ c & - & c \\ d & c & - \end{bmatrix}$                                     |
| F81 [3]                | No                                               | Yes                                     | $\begin{bmatrix} - & \pi_C & \pi_A & \pi_G \\ \pi_T & - & \pi_A & \pi_G \\ \pi_T & \pi_C & - & \pi_G \\ \pi_T & \pi_C & \pi_A & - \end{bmatrix}$                                                                 | $\begin{bmatrix} - & \pi_2 & \pi_3 \\ \pi_1 & - & \pi_3 \\ \pi_1 & \pi_2 & - \end{bmatrix}$             |
| HKY85 [4-5]            | No                                               | No                                      | $\begin{bmatrix} - & \alpha\pi_C & \beta\pi_A & \beta\pi_G \\ \alpha\pi_T & - & \beta\pi_A & \beta\pi_G \\ \beta\pi_T & \beta\pi_C & - & \alpha\pi_G \\ \beta\pi_T & \beta\pi_C & \alpha\pi_A & - \end{bmatrix}$ | $\begin{bmatrix} - & c\pi_2 & d\pi_3 \\ c\pi_1 & - & c\pi_3 \\ d\pi_1 & c\pi_2 & - \end{bmatrix}$       |
| GTR [6]                | No                                               | No                                      | $\begin{bmatrix} - & a\pi_C & b\pi_A & c\pi_G \\ a\pi_T & - & d\pi_A & e\pi_G \\ b\pi_T & d\pi_C & - & f\pi_G \\ c\pi_T & e\pi_C & f\pi_A & - \end{bmatrix}$                                                     | $\begin{bmatrix} - & a\pi_2 & b\pi_3 \\ a\pi_1 & - & c\pi_3 \\ b\pi_1 & c\pi_2 & - \end{bmatrix}$       |

## References

1. Jukes, T. H., and Cantor, C. R. (1969). Evolution of protein molecules. *Mammalian protein metabolism*, 3, 21-132.
2. Kimura, M. (1980). A simple method for estimating evolutionary rates of base substitutions through comparative studies of nucleotide sequences. *Journal of molecular evolution*, 16(2), 111-120.
3. Felsenstein, J. (1981). Evolutionary trees from DNA sequences: a maximum likelihood approach. *Journal of molecular evolution*, 17(6), 368-376.
4. Hasegawa, M., Yano, T. A., & Kishino, H. (1984). A new molecular clock of mitochondrial DNA and the evolution of Hominoids. *Proceedings of the Japan Academy, series B*, 60(4), 95-98.
5. Hasegawa, M., Kishino, H., & Yano, T. A. (1985). Dating of the human-ape splitting by a molecular clock of mitochondrial DNA. *Journal of molecular evolution*, 22(2), 160-174.
6. Tavaré, S. (1986). Some probabilistic and statistical problems in the analysis of DNA sequences. *Lectures on mathematics in the life sciences*, 17(2), 57-86.
